# Supplementary material for: Single nanowire-based fluorescence lifetime thermometer for simultaneous measurement of intra- and extra-cellular temperatures
Source: Royal Society of Chemistry journal article supplement (doi:10.1039/d2cc06597e), 2023-01-01
Supplement: d2cc06597e2.pdf [file d2cc06597e2.pdf]

## 1 **Supporting Information for**

### 2 **Single nanowire-based fluorescence lifetime thermometer for**

### 3 **simultaneous measurement of intra- and extracellular temperature**

4 Yuan Wang,<sup>ab</sup> Qiaowen Zhao,<sup>ab</sup> Sen Liang,<sup>ab</sup> Mingliang Mei,<sup>ab</sup> Guangwei She,<sup>a</sup> Wensheng Shi,<sup>\*abc</sup> and  
5 Lixuan Mu<sup>\*a</sup>

6 <sup>a</sup> Key Laboratory of Photochemical Conversion and Optoelectronic Materials, Technical Institute of  
7 Physics and Chemistry, Chinese Academy of Sciences, Beijing 100190, China

8 <sup>b</sup> University of Chinese Academy of Sciences, Beijing 100049, China

9 <sup>c</sup> Ganjiang Innovation Academy, Chinese Academy of Sciences, Ganzhou 341000, China

10 E-mail: mulixuan@mail.ipc.ac.cn; shiws@mail.ipc.ac.cn.

11

## 12 **EXPERIMENTAL SECTION**

### 13 **Chemicals and solvents**

14 Silicon wafers were purchased from Tianjin Semiconductor Institute. Rhodamine B (RhB) and hydrofluoric acid  
15 (HF) were purchased from Beijing Inoke Technology Co., Ltd. (3-Aminopropyl)triethoxysilane (APTES) were  
16 purchased from Beijing Bailingwei Technology Co., Ltd. Mitoview Blue and cytoplasmic blue dye were purchased  
17 from Beijing Runzekang Biotechnology Co., Ltd. (3-chlorophenyl)carbonohydrazonoyl dicyanide (CCCP) was  
18 purchased from Shenzhen Wenle Biotechnology Co., Ltd. Cisplatin (Beyotime) was purchased from Shanghai  
19 Biyuntian Biotechnology Co., Ltd. Gold nanorods (80 nm in length, 20 nm in diameter) were purchased from  
20 Nanjing Dongna Biotechnology Co., Ltd. All reagents are of analytical grade unless otherwise specified.

### 21 **Apparatus**

22 The SEM images were captured by scanning electron microscope (Hitachi S-4800) and the TEM images were  
23 captured by using the transmission electron microscope (JEOL-2100F). The fluorescence images and fluorescence  
24 lifetime images were captured with laser scanning confocal microscopy (Nikon A1) equipped with PicoQuant PDL  
25 828 Sepia two.

## 1      **Fabrication of silicon nanowire**

2      The silicon nanowire array (NWA) is obtained by the Ag<sup>+</sup>-assisted chemical etching method according to the  
3      previous report<sup>1,2</sup>. Then the NWA was put in the tube furnace. The tube furnace was heated to 900°C slowly and  
4      maintained for 10 - 200 min in oxygen atmosphere. After the tube furnace cooled to room temperature, the NWA  
5      was removed and immersed in the solution of H<sub>2</sub>SO<sub>4</sub> (98%): 30% H<sub>2</sub>O<sub>2</sub> (3:1, v:v) at 90°C for 1 h. After being washed  
6      with water thoroughly, the NWA was dipped into the solution of H<sub>2</sub>O: H<sub>2</sub>O<sub>2</sub>: NH<sub>3</sub>·H<sub>2</sub>O (5:1:1, v:v:v) for 3 h. Then  
7      the NWA was washed with water repeatedly and put into the vacuum oven for 12 h. The dried NWA was reacted  
8      with N-Methylaminopropyltrimethoxysilane in the distilled toluene at 90°C for 24 h to get the amide modified NWA.  
9      The amide modified NWA was washed with ethanol and put into the vacuum oven for at least 12 h.

## 10     **Modification of NWA with RhB**

11     The 300 μmol rhodamine B (RhB) was dissolved in 60 mL anhydrous 1,2-dichloroethane and 0.5 mL POCl<sub>3</sub> was  
12     added. The mixed solution was refluxed for 3 h. When the mixed solution was cooled to room temperature, the  
13     solvent was removed completely under vacuo. The residue was dissolved into the mix solution of 20 mL distilled  
14     acetonitrile and 15 mL distilled triethylamine. After the mixing solution was stirred for 30 min, the dried amide  
15     modified NWA was put into the mixing solution. The solution was refluxed for 24 h to obtain the RhB-modified  
16     NWA. The RhB-modified silicon nanowires were obtained from the RhB-modified NWA by the scalpel.

## 17     **The anti-interference of the NWFLT experiment**

18     In order to assess the anti-interference of the NWFLT, the ions abundantly in cells, such as Na<sup>+</sup>, K<sup>+</sup>, Ca<sup>2+</sup>, and  
19     Mg<sup>2+</sup>, were added into the test solution. The concentration of above agents is 10 mM. Bovine serum albumin (BSA)  
20     was used to simulate the intracellular proteins. The concentration of BSA is 600 μg/mL. After adding the interference  
21     agents, the FL of the NWFLT was tested by the FLIM at 20°C.

1

2

2

4

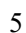

6

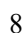

•

10 (b), 50 min (c), 80 min (d) and 200 min (e).

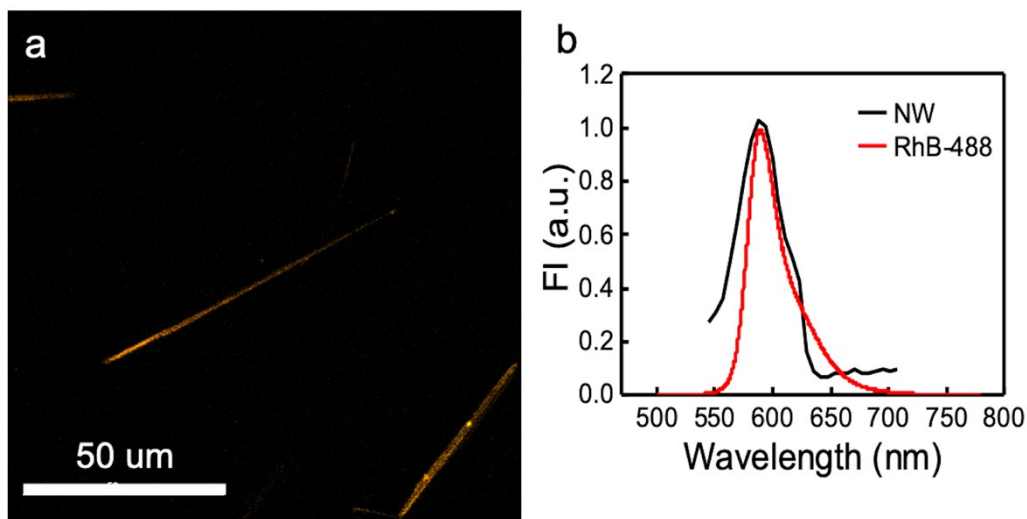

1  
2 **Fig. S3** a) the fluorescence image of the RhB-modified SiNW; d) the  
3 fluorescence spectrum of the RhB-modified SiNW and RhB solution.

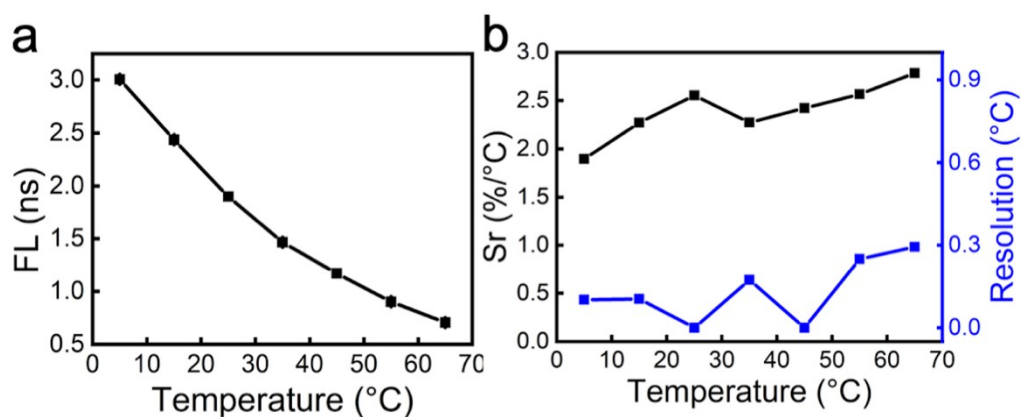

4  
5 **Fig. S4** (a) The fluorescence lifetime of the RhB solution vs. temperatures; (b) the  
6 relative sensitivity and resolution of the RhB to temperature.

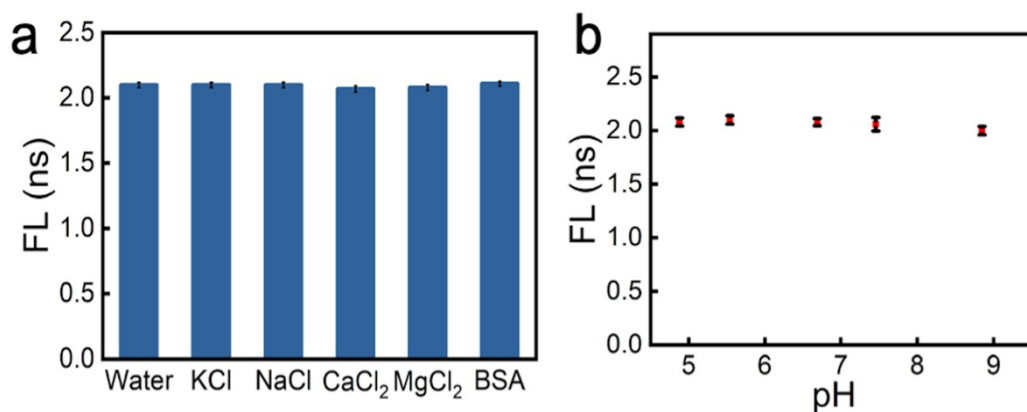

1 **Fig. S5** a) The fluorescence lifetime of the NWFLT in water, solutions containing  
2 different cations and BSA solution at 20°C; b) the fluorescence lifetime of the  
3 NWFLT vs. pH (20°C).

4

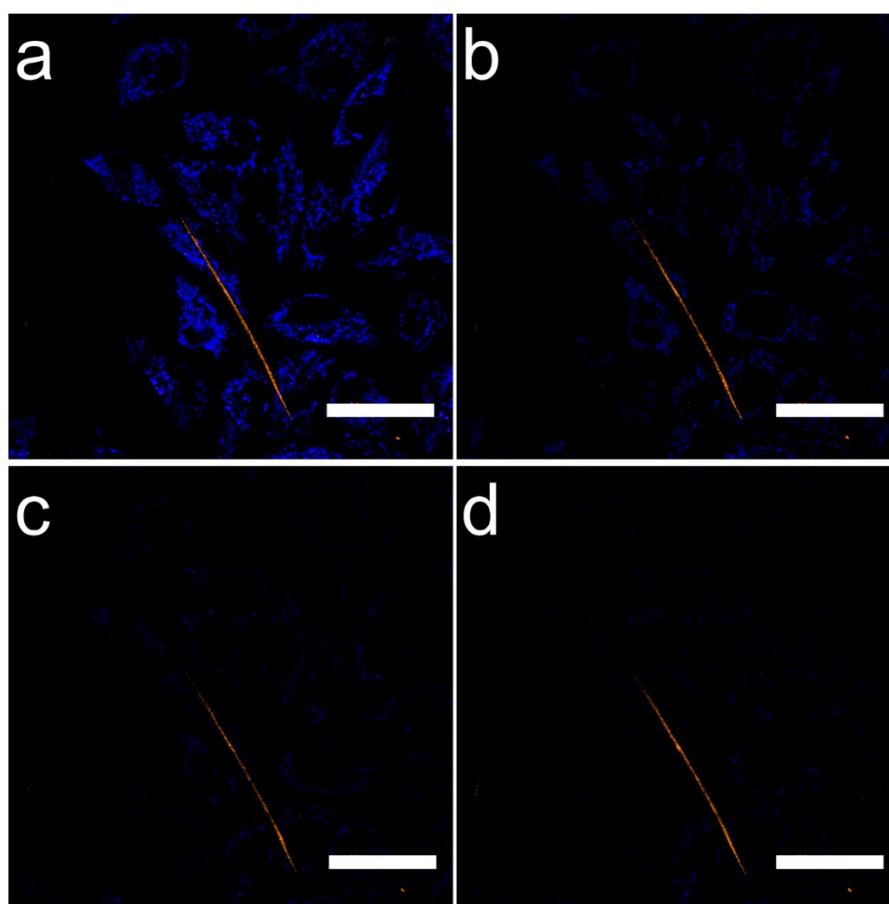

5

6 **Fig. S6** The fluorescence intensity image of the NWFLT and the cells, the blue  
7 fluorescence is from mitochondria dye excited by 405 nm laser while the orange  
8 fluorescence is from the NWFLT excited by 488 nm laser. The irradiation time is 0 min  
9 (a), 10 min (b), 20 min (c), 30 min (d); the scale bars are 30  $\mu$ m.

10

Table S1 The FL of NWFLT with different sample out and in the cell

| Sample | FL(out the cell)/ns | FL(in the cell)/ns | Bis/ns |
|--------|---------------------|--------------------|--------|
| 1      | 2.13                | 2.09               | 0.05   |
| 2      | 1.89                | 1.54               | 0.35   |
| 3      | 2.40                | 1.95               | 0.45   |

|   |      |      |      |
|---|------|------|------|
| 4 | 4.22 | 2.36 | 1.86 |
| 5 | 3.24 | 2.12 | 1.12 |
| 6 | 2.50 | 2.00 | 0.50 |
| 7 | 2.84 | 2.17 | 0.67 |

1

2 Table S2 The FL of NWFLT with different sample before and after add the CCCP

| Sample | Before add CCCP     |                    | After add CCCP      |                    |
|--------|---------------------|--------------------|---------------------|--------------------|
|        | FL(out the cell)/ns | FL(in the cell)/ns | FL(out the cell)/ns | FL(in the cell)/ns |
| 1      | 1.80                | 1.80               | 1.76                | 1.73               |
| 2      | 2.63                | 2.11               | 2.60                | 1.61               |

3

4 Table S3 The FL of NWFLT with different sample before and after add the  $\text{Ca}^{2+}$

| Sample | Before add $\text{Ca}^{2+}$ |                    | After add $\text{Ca}^{2+}$ |                    |
|--------|-----------------------------|--------------------|----------------------------|--------------------|
|        | FL(out the cell)/ns         | FL(in the cell)/ns | FL(out the cell)/ns        | FL(in the cell)/ns |
| 1      | 1.89                        | 1.54               | 1.86                       | 1.79               |
| 2      | 2.84                        | 2.17               | 3.01                       | 2.51               |

5

6

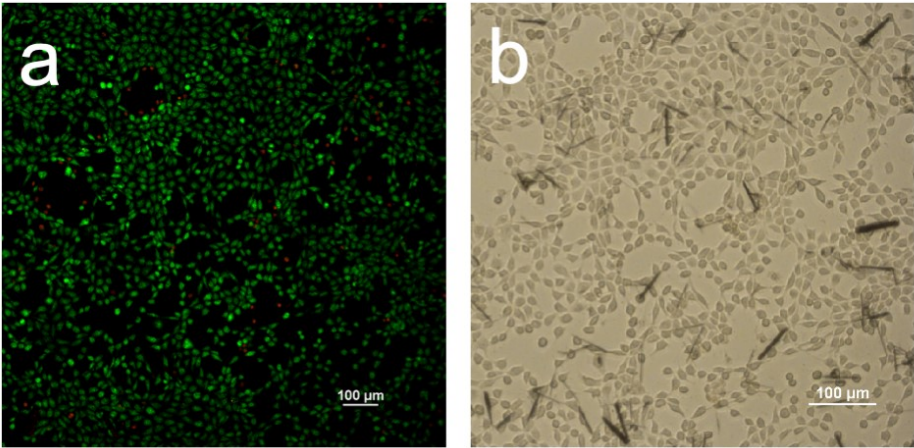

7

8 **Fig. S7** The fluorescence intensity images (a) and bright images (b) of the L929 cells

9 stained with AO and EB after incubation with silicon nanowire for 48 h.

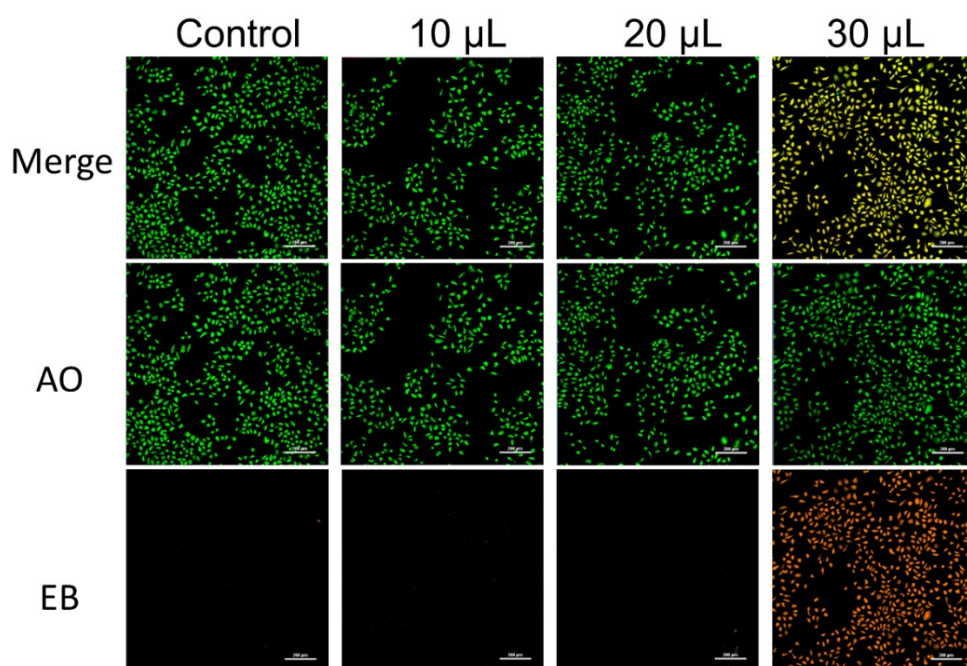

1  
2 **Fig. S8** The fluorescence intensity images of the L929 cells stained with AO and EB  
3 after adding different volumes of cisplatin (10  $\mu$ L, 20  $\mu$ L and 30  $\mu$ L) for 5 h. The  
4 cisplatin solution is 5 mM.

## 5 References

- 6 (s1) Peng, K.;Lu, A.;Zhang, R.;Lee, S.-T., Motility of Metal Nanoparticles in Silicon and Induced  
7 Anisotropic Silicon Etching. *Advanced Functional Materials* **2008**, *18* (19), 3026-3035.
- 8 (s2) Peng, K. Q.;Hu, J. J.;Yan, Y. J.;Wu, Y.;Fang, H.;Xu, Y.;Lee, S. T.;Zhu, J., Fabrication of Single-  
9 Crystalline Silicon Nanowires by Scratching a Silicon Surface with Catalytic Metal Particles. *Advanced*  
10 *Functional Materials* **2006**, *16* (3), 387-394.
- 11 (s3) Kose, M. E.;Carroll, B. F.;Schanze, K. S., Preparation and spectroscopic properties of  
12 multiluminophore luminescent oxygen and temperature sensor films. *Langmuir* **2005**, *21* (20), 9121-  
13 9129.
- 14 (s4) Chapman, C. F.;Liu, Y.;Sonek, G. J.;Tromberg, B. J., The Use of Exogenous Fluorescent-Probes for  
15 Temperature-Measurements in Single Living Cells. *Photochemistry and Photobiology* **1995**, *62* (3),  
16 416-425.

17
